# Supplementary material
Source: PubMed Central journal article supplement (PMC379284)
Supplement: mbc_15_4_1881__1.pdf [file mbc_15_4_1881__1.pdf]

|                                                 | c-Fos | $\alpha$ -Tub | Cells bearing neurites (%) | Neurites               |                         |
|-------------------------------------------------|-------|---------------|----------------------------|------------------------|-------------------------|
|                                                 |       |               |                            | number/cell            | length ( $\mu$ m)       |
| -NGF 4 days                                     |       |               | 3.2 $\pm$ 1.1<br>n=690     | 1.1 $\pm$ 0.3<br>n=26  | 3.0 $\pm$ 1.2*<br>n=28  |
| NGF 4 days                                      |       |               | 84.8 $\pm$ 5.7<br>n=1200   | 2.5 $\pm$ 1.6<br>n=99  | 27.3 $\pm$ 4.3<br>n=95  |
| NGF 4 days<br>NLSF 0 h-4 days                   |       |               | 4.1 $\pm$ 2.5<br>n=1300    | 1.0 $\pm$ 0.0<br>n=32  | 1.4 $\pm$ 0.7*<br>n=34  |
| NGF 4 days<br>NLSF 1h-4 days                    |       |               | 4.9 $\pm$ 3.1<br>n=1000    | 1.1 $\pm$ 0.3<br>n=49  | 2.3 $\pm$ 1.5*<br>n=47  |
| NGF 4 days<br>NLSF 2h-4 days                    |       |               | 7.5 $\pm$ 3.7<br>n=101     | 1.1 $\pm$ 0.3<br>n=101 | 1.9 $\pm$ 1.0*<br>n=104 |
| NGF 4 days<br>NLSF 4h-4 days                    |       |               | 83.5 $\pm$ 8.0<br>n=1200   | 2.5 $\pm$ 0.9<br>n=143 | 29.9 $\pm$ 6.2<br>n=149 |
| NGF 4 days<br>NLSF 4h-4 days<br>ASO 4h-4 days   |       |               | 4.5 $\pm$ 1.9<br>n=1280    | 1.1 $\pm$ 0.3<br>n=47  | 2.0 $\pm$ 0.9*<br>n=54  |
| NGF 4 days<br>NLSF 4h-4 days<br>SO 4h-4 days    |       |               | 85.3 $\pm$ 6.9<br>n=1100   | 2.1 $\pm$ 1.2<br>n=139 | 31.0 $\pm$ 6.9<br>n=154 |
| NGF 4 days<br>NLSF 8h-4 days                    |       |               | 87.0 $\pm$ 6.1<br>n=1200   | 2.8 $\pm$ 1.0<br>n=119 | 32.5 $\pm$ 5.9<br>n=164 |
| NGF 4 days<br>NLSF 8h-4 days<br>ASO 8h-4 days   |       |               | 5.0 $\pm$ 1.1<br>n=1355    | 1.2 $\pm$ 0.9<br>n=59  | 1.9 $\pm$ 1.6*<br>n=53  |
| NGF 4 days<br>NLSF 16h-4 days                   |       |               | 87.8 $\pm$ 7.7<br>n=1300   | 2.6 $\pm$ 1.2<br>n=141 | 30.1 $\pm$ 7.1<br>n=132 |
| NGF 4 days<br>NLSF 16h-4 days<br>ASO 16h-4 days |       |               | 5.6 $\pm$ 1.8<br>n=1480    | 1.0 $\pm$ 0.3<br>n=52  | 5.7 $\pm$ 0.6*<br>n=54  |
